# Supplementary material for: Machine learning-based identification of a consensus immune-derived gene signature to improve head and neck squamous cell carcinoma therapy and outcome
Source: Front Pharmacol. 2024 Apr 10;15:1341346. doi: 10.3389/fphar.2024.1341346 (PMC11044683; doi:10.3389/fphar.2024.1341346)
Supplement: Supplementary file 3 [file Table3.XLSX]

## Sheet: Sheet1
Authors	Signatures	References	PMID
Baoling Liu	CBX3,GNA12,P4HA1,PLAU,PPL,RAB25,EPHX3,HLF	Prognostic Value of Eight-Gene Signature in Head and Neck Squamous Carcinoma	PMID: 34221975
Bohai Feng	FN1,SEMA3A,CDH2,FBN1,COL5A1,ADAM12	Prognostic Gene Signature for Squamous Cell Carcinoma with a Higher Risk for Treatment Failure and Accelerated MEK-ERK Pathway Activity	PMID: 34680330
Cai Yang	EGFR,HSPB8,PRKN,CDKN2A,FADD,ITGA3	Prognostic Correlation of an Autophagy-Related Gene Signature in Patients with Head and Neck Squamous Cell Carcinoma	PMID: 33456497
Chao Huang	FN1,LAMB4,LAMB3,DMP1,CHAD,MMRN1	Novel prognostic matrisome-related gene signature of head and neck squamous cell carcinoma	PMID: 36081907
Cheng Li	MAP1LC3B,FADD,LAMP1	Autophagy-Related Signature for Head and Neck Squamous Cell Carcinoma	PMID: 33133307
Dan Liu	TTLL1,TRIML2,DYNC1I1,KLHL35,CAMK2N1,TNFRSF18,GLDC,SPINK5,DKK1	Developing a pyroptosis-related gene signature to better predict the prognosis and immune status of patients with head and neck squamous cell carcinoma	PMID: 36685979
Daoliang Song	PPP2R1B,MYD88,CD86,CD80,MAP2K1,TRIB3,ICOS	A model of seven immune checkpoint-related genes predicting overall survival for head and neck squamous cell carcinoma	PMID: 33449165
Dongsheng He	MAP1LC3A,SLC7A5,OTUB1,PRDX6,MAP3K5,SOCS1,ATG5,DDIT4,ACSL3,PRKAA2	Prognostic Value of a Ferroptosis-Related Gene Signature in Patients With Head and Neck Squamous Cell Carcinoma	PMID: 34790661
Fan Yang	GTSE1,LRRN4CL,CRYAB,SHOX2,ASNS,KRT23,ANGPT2,HOXA9,CARD11	Nine-gene signature and nomogram for predicting survival in patients with head and neck squamous cell carcinoma	PMID: 36092911
Fang Chen	BAK1,DKK1,CDKN2A,MIF	The Aging-Related Prognostic Signature Reveals the Landscape of the Tumor Immune Microenvironment in Head and Neck Squamous Cell Carcinoma	PMID: 35619896
Guangsheng Hu	NCBP2,MKRN3,MRPL47,AZGP1,IGF2BP2,EZH2	Integrated Analysis of RNA-Binding Proteins Associated With the Prognosis and Immunosuppression in Squamous Cell Carcinoma of Head and Neck	PMID:33505420
Haige Zheng	SLURP1,SCARA5,CLDN10,MYH11,CXCL13,HLF,ITGA3	Identification of a Novel Signature Predicting Overall Survival in Head and Neck Squamous Cell Carcinoma	PMID: 34631779
Hongyu Zhao	CDKN2A,CELSR3,DMRTA2,SERPINE1,TJP3,FADD,IGF2BP2	HPV-Related Prognostic Signature Predicts Survival in Head and Neck Squamous Cell Carcinoma	PMID: 36425940
Hua Zhang	GABARAPL2,SAR1A,ST13,GAPDH,FADD,LAMP1	Signature Based on Six Autophagy-related Genes to Predict Prognosis of Head and Neck Squamous Cell Carcinoma	PMID: 35648284
Huili Wu	PYGL,ALG3,EXT2,FUT2,KDELC1	A Glycosyltransferase-Related Signature for Predicting Overall Survival in Head and Neck Squamous Cell Carcinoma	PMID: 35899200
Jiabao Ma	ZNF10,TMPRSS12,ERGIC2,RNF215	Characterization of a prognostic four‑gene methylation signature associated with radiotherapy for head and neck squamous cell carcinoma	PMID: 31180552
Jing Yang	APP,CDKN2A,EGFR,HSPD1,IL2RG,PLAU,VEGFA	Identification of prognostic aging-related genes associated with immunosuppression and inflammation in head and neck squamous cell carcinoma	PMID: 33232279
Juncheng Wang1	BRCA1,OSTM1,PCGF2,PSMD2,SOCS1,UCHL1,UHRF1,USP54	Comprehensive analysis of ubiquitin-proteasome system genes related to prognosis and immunosuppression in head and neck squamous cell carcinoma	PMID: 34398824
Juncheng Wang2	CD3E,SASH3,CD2,SIRPG,UBASH3A,IKZF1,SPN,IL10RA,SLA,CD3G	Establishment and validation of immune microenvironmental gene signatures for predicting prognosis in patients with head and neck squamous cell carcinoma	PMID: 34091115
Ke Yang	SERPINE1,PLAU,ACTA1	Identification of SERPINE1, PLAU and ACTA1 as biomarkers of head and neck squamous cell carcinoma based on integrated bioinformatics analysis	PMID: 30937621
LangXiong Chen	HPRT1,STC2,PLCB3,GPR87,PYGL,SLC5A12	Six Glycolysis-Related Genes as Prognostic Risk Markers Can Predict the Prognosis of Patients with Head and Neck Squamous Cell Carcinoma	PMID: 33628816
Li Xu	ATG5,PRDX6,OTUB1,FTH1,SOCS1,MAP3K5	A Novel Ferroptosis-Related Gene Signature to Predict Prognosis in Patients with Head and Neck Squamous Cell Carcinoma	PMID: 34853622
Lizhu Chen	BRINP1,IL17A,ALB,FOXA2,ZCCHC12	Construction and validation of a prognostic model based on stage-associated signature genes of head and neck squamous cell carcinoma: a bioinformatics study	PMID: 36660709
Muyuan Liu	ADTRP,ITGA3,RFC4,CCDC96,CYP2J2,NELL2,SPHK1,SPAG16,HBEGF,S100A9,EGFL6,ADGRG6,PDE4D,ABCA4,CTTN	A 15-Gene Signature and Prognostic Nomogram for Predicting Overall Survival in Non-Distant Metastatic Oral Tongue Squamous Cell Carcinoma	PMID: 33767977
Qilong Zhong	AC103702.2,LINC00941,RPL29,FOXL2,CCL11	Identification of prognostic marker genes in head and neck squamous cell carcinoma: A study based on The Cancer Genome Atlas database and experimental validation	PMID: 33880801
Qun Li	FLT3,IL6,Keap1,NQO1,SOCS1,TRIB3	Construction of a Ferroptosis-Related Gene Signature for Head and Neck Squamous Cell Carcinoma Prognosis Prediction	PMID: 34992433
Ruijie Ming	FRMD4A,ASNS,RAB11FIP1,FAM120C,CFLAR,CTTN,PLEKHO1,SELENBP1,CHCHD2,NPM3,ATP2A3,CFDP1,IGF2BP2,NQO1,DENND2D	The Prognostic Signature of Head and Neck Squamous Cell Carcinoma Constructed by Immune-Related RNA-Binding Proteins	PMID: 35449571
Saisai Tian	FOXL2NB,PCOLCE2,SPINK6,ULBP2,KCNJ18,RFPL1	A six-mRNA prognostic model to predict survival in head and neck squamous cell carcinoma	PMID: 30588115
Shixian Liu	SSB,PFKP,NAT10,PCDH9,SHANK2,PAX8,CELSR3,DCLRE1C,MAP2K7,ODF4	Identification and validation of a novel tumor driver gene signature for diagnosis and prognosis of head and neck squamous cell carcinoma	PMID: 36339718
Suran Li	SRPX,PGK1,STG1,HS3ST1,CDKN1B,HK1	Development and validation of a novel hypoxia-related signature for prognostic and immunogenic evaluation in head and neck squamous cell carcinoma	PMID: 36452497
Wei Lu	FTH1,BNIP3,TRIB3,SLC2A3	A Ferroptosis-Related Gene Signature for Predicting the Prognosis and Drug Sensitivity of Head and Neck Squamous Cell Carcinoma	PMID: 34745224
Wei Xin	WIPF1,PPIB,BASP1,PLOD2	Identification of a Novel Epithelial-Mesenchymal Transition Gene Signature Predicting Survival in Patients With HNSCC	PMID: 34257533
Xiaolei Gao	ADCY2,LIPE,OLR1	A Novel Lipid Prognostic Signature of ADCY2, LIPE, and OLR1 in Head and Neck Squamous Cell Carcinoma	PMID: 34900686
Xinyuan Zhao	YTHDC2,HNRNPC	Development and validation of a m6A RNA methylation regulators-based signature for predicting the prognosis of head and neck squamous cell carcinoma	PMID: 31720080
Xiwang Zheng	CAT,MTFR1L,OXA1L,POLE,NTHL1,DNA2,ATP7B,ISCA2,GLRX5,NDUFA1,NDUFB2	An original cuproptosis-related genes signature effectively influences the prognosis and immune status of head and neck squamous cell carcinoma	PMID: 36685880
Yao Yao	PVR,TNFRSF12A,IL21R,SOCS1	Prognostic value of novel immune-related genomic biomarkers identified in head and neck squamous cell carcinoma	PMID: 32719094
Yi Zhang	PLAU,STC2,TNFRSF4,PDGFA,DKK1,CHGB	A Novel Immune-Related Prognostic Signature in Head and Neck Squamous Cell Carcinoma	PMID: 34220923
Yilong Lu	ADGRE1,OLR1,TIMP1,GPR132,CCR7	Inflammation-Related Gene Signature for Predicting the Prognosis of Head and Neck Squamous Cell Carcinoma	PMID: 35592543
Yingying Wang	CD3E,CD40LG,TNFRSF4,CD3G,CD5,ITGA2B,ABCB1,TNFRSF13b	Novel Prognostic Model Based on Immune Signature for Head and Neck Squamous Cell Carcinoma	PMID: 33134377
Yu Jin1	ITGA3,CDKN2A,FADD,NKX2-3,BAK1,CXCR4,HSPB8	Development of a Prognostic Signature Based on Autophagy-related Genes for Head and Neck Squamous Cell Carcinoma	PMID: 32948377
Yu Jin2	NOVA1,EZH2,RBM24	Comprehensive Analysis of the Roles and Prognostic Value of RNA-Binding Proteins in Head and Neck Squamous Cell Carcinoma	PMID: 32716650
Yu Qiu	FOXP3,SNAI2,STAT1	Development and Validation of a Robust Immune Prognostic Signature for Head and Neck Squamous Cell Carcinoma	PMID: 33224866
Yue Jiang	EGFR,FADD,PARK2	Identification of an autophagy-related prognostic signature in head and neck squamous cell carcinoma	PMID: 34358365
Yuri Belotti	MASP1,EGFL6,SFRP5,SPP1,MMP8,P4HA1	Prognostic Matrisomal Gene Panel and Its Association with Immune Cell Infiltration in Head and Neck Carcinomas	PMID: 34830910
Zhanzhan Li	CASP1,GSDME,IL6,NLRP1,NLRP2,NLRP6,NOD2	Identification of pyroptosis-related gene prognostic signature in head and neck squamous cell carcinoma	PMID: 35574984
Zhenyuan Han	NSUN5,DNMT1,DNMT3A	Identification of Expression Patterns and Potential Prognostic Significance of m5C-Related Regulators in Head and Neck Squamous Cell Carcinoma	PMID: 33912441
Zhifeng Liu	CCL13,CCR7,CD276,IL1B,LYVE1,VEGFC	Comprehensive Analysis of Myeloid Signature Genes in Head and Neck Squamous Cell Carcinoma to Predict the Prognosis and Immune Infiltration	PMID: 33995379
Zhimou Cai	KIT,RAB32,CATSPER1,SMYD3,LINC00996,SOCS1,AP2M1,LAT,HSP90B1	Mast cell marker gene signature in head and neck squamous cell carcinoma	PMID: 35610596
Zijing Huang	ERMP1,RNASE3,ARL4D,CSRP2,ULK1,ZC3H12D,RPS28	Identification and validation of seven RNA binding protein genes as a prognostic signature in oral cavity squamous cell carcinoma	PMID: 34585646
Ziying Ren	GABARAPL1,ITGA3,USP10,ST13,MAPK9,PRKN,FADD,IKBKB,ITPR1,TP73,MAP2K7,CDKN2A,EEF2K	Development and validation of a novel survival model for head and neck squamous cell carcinoma based on autophagy-related genes	PMID: 33227411
Zizhao Mai	HPRT1,PLOD2,ASNS,TXNRD1,CYP27B1,FUT6	A Robust Metabolic Enzyme-Based Prognostic Signature for Head and Neck Squamous Cell Carcinoma	PMID: 35127477
